# Supplementary material
Source: PubMed Central journal article supplement (PMC5380000)
Supplement: NIHMS853160-supplement-Sup.pdf [file NIHMS853160-supplement-Sup.pdf]

Supplemental Material for:  
*Applied Microbiology and Biotechnology*

Surfactant-induced bacterial community changes correlated with increased polycyclic aromatic hydrocarbon degradation in contaminated soil  
David R. Singleton<sup>1#</sup>, Alden C. Adrion<sup>1</sup>, Michael D. Aitken<sup>1</sup>

<sup>1</sup> Department of Environmental Sciences and Engineering  
Gillings School of Global Public Health  
University of North Carolina, Chapel Hill, NC 27599-7430

#Corresponding author:  
Room 0030 Michael Hooker Research Center, CB#7431  
Department of Environmental Sciences and Engineering  
Gillings School of Global Public Health  
University of North Carolina, Chapel Hill, NC 27599-7430  
[drsingl@ad.unc.edu](mailto:drsingl@ad.unc.edu)  
(p) 919-966-5452; (f) 919-966-7911

Table S1. Average (and standard deviation) concentrations of PAHs in bioreactor slurry and in treatments after 14 days of post-bioreactor incubation ( $\mu\text{g/g}$  dry soil).

| PAH | Bioreactor  | NoSurf                    | BrijLow                   | BrijHigh                 | POESH                     |
|-----|-------------|---------------------------|---------------------------|--------------------------|---------------------------|
| NAP | 19.9 (1.37) | 17.0 (1.50)               | 16.9 (1.76)               | 17.7 (0.53)              | 17.0 (1.11)               |
| ACE | 2.19 (0.11) | 1.69 (0.38) <sup>a</sup>  | 1.16 (0.10) <sup>ab</sup> | 1.08 (0.17) <sup>b</sup> | 1.36 (0.07) <sup>ab</sup> |
| FLU | 1.98 (0.14) | 1.55 (0.20)               | 1.16 (0.14)               | 1.15 (0.20)              | 1.26 (0.09)               |
| PHN | 29.7 (2.82) | 22.2 (4.08) <sup>a</sup>  | 16.0 (1.63) <sup>ab</sup> | 14.6 (1.35) <sup>b</sup> | 17.3 (2.82) <sup>ab</sup> |
| ANT | 3.04 (0.26) | 2.48 (0.37) <sup>a</sup>  | 2.25 (0.14) <sup>ab</sup> | 1.87 (0.09) <sup>c</sup> | 1.93 (0.10) <sup>b</sup>  |
| FLA | 19.4 (0.48) | 13.3 (0.85) <sup>a</sup>  | 6.87 (1.08) <sup>b</sup>  | 7.06 (0.81) <sup>b</sup> | 6.02 (0.54) <sup>b</sup>  |
| PYR | 32.8 (0.63) | 22.9 (1.26) <sup>a</sup>  | 9.91 (0.82) <sup>b</sup>  | 26.3 (3.13) <sup>a</sup> | 8.89 (1.20) <sup>b</sup>  |
| BaA | 16.4 (0.45) | 12.4 (1.25) <sup>a</sup>  | 6.23 (0.79) <sup>b</sup>  | 13.8 (1.25) <sup>a</sup> | 4.55 (0.33) <sup>b</sup>  |
| CHR | 21.1 (4.61) | 13.4 (1.23) <sup>a</sup>  | 6.15 (1.10) <sup>b</sup>  | 13.8 (1.70) <sup>a</sup> | 3.98 (0.27) <sup>b</sup>  |
| BbF | 14.2 (0.11) | 10.8 (0.73) <sup>b</sup>  | 9.63 (0.71) <sup>b</sup>  | 13.5 (0.43) <sup>a</sup> | 10.2 (0.31) <sup>b</sup>  |
| BkF | 6.91 (0.25) | 5.40 (0.24) <sup>ab</sup> | 4.41 (0.33) <sup>c</sup>  | 5.89 (0.10) <sup>a</sup> | 4.58 (0.56) <sup>bc</sup> |
| BaP | 17.0 (0.60) | 14.3 (1.12)               | 13.5 (1.10)               | 16.3 (1.20)              | 13.3 (1.51)               |
| DBA | 1.27 (0.09) | 1.05 (0.01)               | 1.08 (0.09)               | 1.16 (0.23)              | 1.02 (0.27)               |
| BgP | 24.0 (1.13) | 22.5 (2.58)               | 22.5 (2.40)               | 25.0 (2.25)              | 23.9 (0.09)               |

Abbreviations as in Figure 1. Identical superscripted letters indicate no significant difference between values in the four treatment conditions for that compound ( $p < 0.05$ ; Tukey's HSD). No superscripted letters among all conditions within a row indicate that the ANOVA for all samples was not significant ( $p < 0.05$ ).

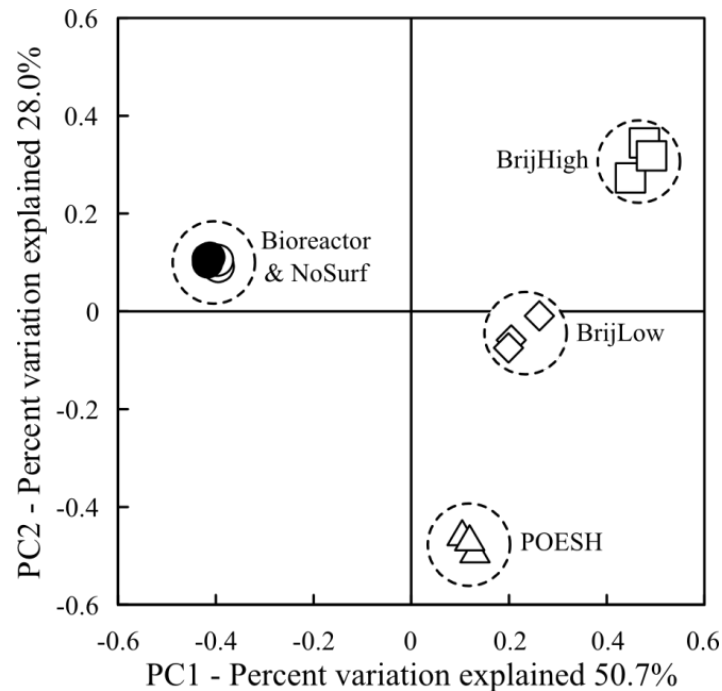

Figure S1. PCoA plot based on triplicate 16S rRNA gene amplicon libraries for each condition. Symbols for some Bioreactor and NoSurf replicates are obscured by other libraries within those conditions.

Table S2. Classifier phylogeny and relative abundance of all OTUs with an average representation of at least 0.1% in at least one condition.

| OTU | Classifier results                                                                                                                                                                 | Bioreactor                    | NoSurf            | BrijLow           | BrijHigh          | POESH             |
|-----|------------------------------------------------------------------------------------------------------------------------------------------------------------------------------------|-------------------------------|-------------------|-------------------|-------------------|-------------------|
| 1   | <i>Bacteria</i> (100); <i>Bacteroidetes</i> (100); unclassified (100); unclassified (100); unclassified (100); unclassified (100);                                                 | <b>10.4 (0.9)<sup>a</sup></b> | <b>5.5 (0.9)</b>  | <b>10.8 (0.7)</b> | <b>4.5 (7.5)</b>  | <b>5.2 (0.6)</b>  |
| 2   | <i>Bacteria</i> (100); <i>Proteobacteria</i> (100); <i>Gammaproteobacteria</i> (100); unclassified (100); unclassified (100); unclassified (100);                                  | <b>11.0 (0.6)</b>             | <b>13.7 (0.6)</b> | <b>3.8 (0.5)</b>  | <b>1.0 (0.5)</b>  | <b>4.3 (1.0)</b>  |
| 3   | <i>Bacteria</i> (100); <i>Bacteroidetes</i> (100); <i>Sphingobacteriia</i> (100); <i>Sphingobacteriales</i> (100); <i>Chitinophagaceae</i> (100); <i>Sediminibacterium</i> (100);  | 0.6 (0.1)                     | <b>1.0 (0.1)</b>  | <b>7.3 (0.5)</b>  | <b>5.7 (1.2)</b>  | <b>21.3 (0.8)</b> |
| 4   | <i>Bacteria</i> (100); <i>Proteobacteria</i> (100); <i>Gammaproteobacteria</i> (100); <i>Pseudomonadales</i> (100); <i>Pseudomonadaceae</i> (100); <i>Pseudomonas</i> (100);       | 0.4 (0.1)                     | 0.3 (0.0)         | <b>8.8 (1.9)</b>  | <b>21.1 (0.8)</b> | 0.3 (0.1)         |
| 5   | <i>Bacteria</i> (100); <i>Proteobacteria</i> (100); <i>Alphaproteobacteria</i> (100); unclassified (100); unclassified (100); unclassified (100);                                  | <b>2.1 (0.2)</b>              | <b>3.7 (0.2)</b>  | <b>8.4 (1.6)</b>  | <b>1.7 (0.7)</b>  | <b>8.3 (2.8)</b>  |
| 6   | <i>Bacteria</i> (100); <i>Bacteroidetes</i> (100); unclassified (100); unclassified (100); unclassified (100); unclassified (100);                                                 | <b>5.5 (0.4)</b>              | <b>10.2 (0.3)</b> | 0.6 (0.5)         | 0.1 (0.0)         | 1.0 (0.2)         |
| 7   | <i>Bacteria</i> (100); <i>Proteobacteria</i> (100); <i>Gammaproteobacteria</i> (100); <i>Pseudomonadales</i> (100); <i>Moraxellaceae</i> (100); unclassified (100);                | <b>5.2 (0.3)</b>              | <b>3.0 (0.3)</b>  | <b>1.9 (0.2)</b>  | 0.4 (0.1)         | <b>6.8 (2.8)</b>  |
| 8   | <i>Bacteria</i> (100); <i>Proteobacteria</i> (100); <i>Gammaproteobacteria</i> (100); unclassified (100); unclassified (100); unclassified (100);                                  | <b>2.7 (0.2)</b>              | <b>6.9 (0.4)</b>  | <b>3.8 (0.2)</b>  | <b>3.7 (0.8)</b>  | <b>1.1 (0.3)</b>  |
| 9   | <i>Bacteria</i> (100); <i>Proteobacteria</i> (100); <i>Alphaproteobacteria</i> (100); <i>Caulobacterales</i> (100); <i>Caulobacteraceae</i> (100); <i>Caulobacter</i> (100);       | 0.2 (0.0)                     | 0.1 (0.0)         | 0.9 (0.2)         | <b>14.5 (2.2)</b> | 0.3 (0.0)         |
| 10  | <i>Bacteria</i> (100); <i>Verrucomicrobia</i> (100); <i>Opitutae</i> (100); <i>Opitiales</i> (100); <i>Opitutaceae</i> (100); <i>Opitutus</i> (100);                               | <b>2.1 (0.3)</b>              | <b>2.2 (0.3)</b>  | 0.7 (0.1)         | 0.5 (0.1)         | <b>6.3 (0.7)</b>  |
| 11  | <i>Bacteria</i> (100); <i>Proteobacteria</i> (100); <i>Alphaproteobacteria</i> (100); <i>Caulobacterales</i> (100); <i>Caulobacteraceae</i> (100); <i>Phenylobacterium</i> (100);  | 0.2 (0.0)                     | 0.2 (0.0)         | <b>10.6 (1.2)</b> | 0.2 (0.1)         | <b>2.1 (0.1)</b>  |
| 12  | <i>Bacteria</i> (100); unclassified (100); unclassified (100); unclassified (100); unclassified (100);                                                                             | <b>3.1 (0.4)</b>              | <b>3.8 (0.4)</b>  | <b>1.7 (0.0)</b>  | 0.2 (0.1)         | <b>2.2 (0.9)</b>  |
| 13  | <i>Bacteria</i> (100); <i>Proteobacteria</i> (100); <i>Gammaproteobacteria</i> (100); <i>Xanthomonadales</i> (100); <i>Xanthomonadaceae</i> (100); <i>Pseudoxanthomonas</i> (100); | 0.2 (0.0)                     | 0.1 (0.0)         | <b>5.4 (0.2)</b>  | <b>8.5 (1.6)</b>  | 0.2 (0.0)         |
| 14  | <i>Bacteria</i> (100); <i>Bacteroidetes</i> (100); <i>Sphingobacteriia</i> (100); <i>Sphingobacteriales</i> (100); <i>Chitinophagaceae</i> (100); <i>Terrimonas</i> (100);         | 0.3 (0.0)                     | 0.8 (0.1)         | <b>1.5 (0.5)</b>  | 0.5 (0.5)         | <b>8.9 (1.8)</b>  |
| 15  | <i>Bacteria</i> (100); <i>Proteobacteria</i> (100); <i>Gammaproteobacteria</i> (100); <i>Xanthomonadales</i> (100); <i>Xanthomonadaceae</i> (100); <i>Lysobacter</i> (100);        | 0.1 (0.0)                     | 0.1 (0.0)         | <b>4.9 (0.3)</b>  | <b>4.8 (2.2)</b>  | <b>1.8 (0.2)</b>  |
| 16  | <i>Bacteria</i> (100); <i>Bacteroidetes</i> (100); <i>Sphingobacteriia</i> (100); <i>Sphingobacteriales</i> (100); <i>Chitinophagaceae</i> (100); unclassified (100);              | <b>2.9 (0.1)</b>              | <b>4.0 (0.2)</b>  | 0.2 (0.0)         | 0.2 (0.0)         | <b>1.7 (0.1)</b>  |
| 17  | <i>Bacteria</i> (100); <i>Proteobacteria</i> (100); <i>Alphaproteobacteria</i> (100); <i>Sphingomonadales</i> (100); <i>Sphingomonadaceae</i> (100); <i>Novosphingobium</i> (98);  | 0.5 (0.1)                     | 0.5 (0.1)         | 0.6 (0.4)         | 0.3 (0.1)         | <b>7.5 (5.0)</b>  |
| 18  | <i>Bacteria</i> (100); <i>Verrucomicrobia</i> (100); Subdivision3 (100); unclassified (100); unclassified (100); unclassified (100);                                               | <b>2.9 (0.2)</b>              | <b>4.1 (0.5)</b>  | 0.3 (0.0)         | 0.1 (0.0)         | 0.1 (0.0)         |

|    |                                                                                                                                                                                           |                  |                  |                  |                  |                  |
|----|-------------------------------------------------------------------------------------------------------------------------------------------------------------------------------------------|------------------|------------------|------------------|------------------|------------------|
| 19 | <i>Bacteria</i> (100); <i>Proteobacteria</i> (100);<br><i>Alphaproteobacteria</i> (92); <i>Rhizobiales</i> (92);<br><i>Rhizobiaceae</i> (92); <i>Rhizobium</i> (92);                      | 0.7 (0.1)        | 0.3 (0.0)        | <b>1.3 (0.1)</b> | <b>4.1 (1.3)</b> | <b>2.5 (1.1)</b> |
| 20 | <i>Bacteria</i> (100); <i>Proteobacteria</i> (100);<br><i>Alphaproteobacteria</i> (100); <i>Rhizobiales</i> (100);<br><i>Bradyrhizobiaceae</i> (100); unclassified (99);                  | 0.1 (0.0)        | 0.1 (0.0)        | <b>8.1 (0.6)</b> | 0.5 (0.4)        | 0.1 (0.0)        |
| 21 | <i>Bacteria</i> (100); <i>Actinobacteria</i> (99); <i>Actinobacteria</i><br>(99); unclassified (99); unclassified (99);<br>unclassified (99);                                             | <b>2.1 (0.6)</b> | <b>3.3 (0.2)</b> | 0.4 (0.1)        | 0.3 (0.0)        | 0.4 (0.1)        |
| 22 | <i>Bacteria</i> (100); <i>Proteobacteria</i> (89);<br><i>Alphaproteobacteria</i> (52); unclassified (52);<br>unclassified (52); unclassified (52);                                        | <b>2.0 (0.2)</b> | <b>1.7 (0.0)</b> | <b>1.3 (0.0)</b> | 0.6 (0.1)        | 0.5 (0.1)        |
| 23 | <i>Bacteria</i> (100); <i>Proteobacteria</i> (100);<br><i>Betaproteobacteria</i> (100); <i>Hydrogenophilales</i><br>(100); <i>Hydrogenophilaceae</i> (100); <i>Thiobacillus</i><br>(100); | <b>2.6 (0.2)</b> | <b>1.2 (0.1)</b> | 0.3 (0.1)        | 0.1 (0.0)        | 0.2 (0.1)        |
| 24 | <i>Bacteria</i> (100); <i>Proteobacteria</i> (100);<br><i>Alphaproteobacteria</i> (100); <i>Sphingomonadales</i><br>(100); <i>Sphingomonadaceae</i> (100); <i>Sphingomonas</i><br>(97);   | <b>1.8 (0.2)</b> | <b>1.9 (0.2)</b> | 0.2 (0.0)        | 0.2 (0.1)        | 0.2 (0.0)        |
| 25 | <i>Bacteria</i> (100); <i>Proteobacteria</i> (100);<br><i>Betaproteobacteria</i> (100); <i>Burkholderiales</i> (100);<br><i>Comamonadaceae</i> (100); unclassified (99);                  | <b>1.5 (0.1)</b> | 0.9 (0.1)        | <b>1.5 (0.2)</b> | 0.1 (0.1)        | 0.5 (0.1)        |
| 26 | <i>Bacteria</i> (100); <i>Bacteroidetes</i> (100);<br><i>Sphingobacteriia</i> (100); <i>Sphingobacteriales</i> (100);<br><i>Chitinophagaceae</i> (100); <i>Sediminibacterium</i> (99);    | 0.1 (0.0)        | 0.1 (0.0)        | 0.1 (0.0)        | <b>4.6 (7.5)</b> | 0.2 (0.0)        |
| 27 | <i>Bacteria</i> (100); <i>Proteobacteria</i> (100);<br><i>Betaproteobacteria</i> (100); <i>Burkholderiales</i> (100);<br><i>Comamonadaceae</i> (100); <i>Acidovorax</i> (72);             | 0.3 (0.0)        | 0.3 (0.0)        | <b>2.0 (0.4)</b> | <b>1.2 (1.2)</b> | <b>1.0 (0.6)</b> |
| 28 | <i>Bacteria</i> (100); <i>Proteobacteria</i> (100);<br><i>Alphaproteobacteria</i> (100); <i>Sphingomonadales</i><br>(100); <i>Sphingomonadaceae</i> (96); <i>Sphingobium</i><br>(93);     | 0.2 (0.0)        | 0.1 (0.0)        | 0.1 (0.0)        | <b>3.7 (0.9)</b> | 0.7 (0.2)        |
| 29 | <i>Bacteria</i> (100); <i>Proteobacteria</i> (100);<br><i>Betaproteobacteria</i> (100); unclassified (100);<br>unclassified (100); unclassified (100);                                    | 0.9 (0.2)        | <b>1.8 (0.2)</b> | 0.1 (0.0)        | 0.0 (0.0)        | 0.5 (0.1)        |
| 30 | <i>Bacteria</i> (100); <i>Acidobacteria</i> (99);<br><i>Acidobacteria_Gp6</i> (99); Gp6 (99); unclassified<br>(99); unclassified (99);                                                    | <b>1.6 (0.2)</b> | 0.8 (0.1)        | 0.0 (0.0)        | 0.0 (0.0)        | 0.4 (0.1)        |
| 31 | <i>Bacteria</i> (100); <i>Proteobacteria</i> (100);<br><i>Gammaproteobacteria</i> (100); unclassified (100);<br>unclassified (100); unclassified (100);                                   | <b>1.1 (0.1)</b> | <b>1.4 (0.2)</b> | 0.2 (0.0)        | 0.1 (0.0)        | 0.3 (0.1)        |
| 32 | <i>Bacteria</i> (100); <i>Acidobacteria</i> (100);<br><i>Acidobacteria_Gp6</i> (100); Gp6 (100); unclassified<br>(100); unclassified (100);                                               | 0.8 (0.1)        | <b>1.7 (0.3)</b> | 0.0 (0.0)        | 0.0 (0.0)        | 0.2 (0.0)        |
| 33 | <i>Bacteria</i> (100); <i>Acidobacteria</i> (100);<br><i>Acidobacteria_Gp3</i> (100); Gp3 (98); unclassified<br>(98); unclassified (98);                                                  | <b>1.1 (0.3)</b> | 0.9 (0.1)        | 0.0 (0.0)        | 0.0 (0.0)        | 0.7 (0.1)        |
| 34 | <i>Bacteria</i> (100); <i>Planctomycetes</i> (100);<br><i>Planctomycetia</i> (100); <i>Planctomycetales</i> (100);<br><i>Planctomycetaceae</i> (100); <i>Planctomyces</i> (98);           | <b>1.4 (0.2)</b> | 0.8 (0.0)        | 0.1 (0.0)        | 0.0 (0.0)        | 0.1 (0.0)        |
| 35 | <i>Bacteria</i> (100); <i>Proteobacteria</i> (100);<br><i>Alphaproteobacteria</i> (100); <i>Caulobacterales</i> (100);<br><i>Caulobacteraceae</i> (100); <i>Phenylobacterium</i> (100);   | 0.2 (0.1)        | 0.1 (0.0)        | 0.7 (0.1)        | <b>2.6 (0.2)</b> | 0.1 (0.0)        |
| 36 | <i>Bacteria</i> (100); <i>Bacteroidetes</i> (100);<br><i>Sphingobacteriia</i> (100); <i>Sphingobacteriales</i> (100);<br><i>Chitinophagaceae</i> (100); unclassified (99);                | 0.1 (0.0)        | 0.2 (0.1)        | <b>2.1 (0.3)</b> | 0.0 (0.0)        | 0.4 (0.1)        |
| 37 | <i>Bacteria</i> (100); unclassified (100); unclassified<br>(100); unclassified (100); unclassified (100);<br>unclassified (100);                                                          | 0.7 (0.1)        | <b>1.0 (0.1)</b> | 0.2 (0.1)        | 0.1 (0.0)        | 0.3 (0.1)        |

|    |                                                                                                                                                                                                |                  |                  |                  |                  |                  |
|----|------------------------------------------------------------------------------------------------------------------------------------------------------------------------------------------------|------------------|------------------|------------------|------------------|------------------|
| 38 | <i>Bacteria</i> (100); <i>Proteobacteria</i> (100);<br><i>Alphaproteobacteria</i> (100); <i>Sphingomonadales</i><br>(100); <i>Sphingomonadaceae</i> (100); <i>Sphingomonas</i><br>(100);       | 0.7 (0.1)        | <b>1.2 (0.2)</b> | 0.1 (0.0)        | 0.2 (0.0)        | 0.1 (0.0)        |
| 39 | <i>Bacteria</i> (100); <i>Acidobacteria</i> (100);<br><i>Acidobacteria_Gp4</i> (100); Gp4 (100); unclassified<br>(100); unclassified (100);                                                    | 0.3 (0.0)        | 0.5 (0.1)        | 0.1 (0.0)        | 0.0 (0.0)        | <b>1.4 (0.2)</b> |
| 40 | <i>Bacteria</i> (100); <i>Proteobacteria</i> (100);<br><i>Gammaproteobacteria</i> (100); <i>Legionellales</i> (100);<br><i>Coxiellaceae</i> (100); <i>Coxiella</i> (100);                      | 0.9 (0.1)        | 0.7 (0.1)        | 0.2 (0.0)        | 0.1 (0.1)        | 0.3 (0.1)        |
| 41 | <i>Bacteria</i> (100); <i>Parcubacteria</i> (93); unclassified<br>(93); unclassified (93); unclassified (93);<br>unclassified (93);                                                            | <b>1.0 (0.4)</b> | 0.6 (0.0)        | 0.1 (0.0)        | 0.1 (0.0)        | 0.2 (0.1)        |
| 42 | <i>Bacteria</i> (100); <i>Planctomycetes</i> (100);<br><i>Planctomycetia</i> (100); <i>Planctomycetales</i> (100);<br><i>Planctomycetaceae</i> (100); unclassified (100);                      | 0.5 (0.0)        | 0.9 (0.1)        | 0.2 (0.0)        | 0.1 (0.0)        | 0.2 (0.0)        |
| 43 | <i>Bacteria</i> (100); <i>Bacteroidetes</i> (100);<br><i>Sphingobacteriia</i> (100); <i>Sphingobacteriales</i> (100);<br><i>Sphingobacteriaceae</i> (100); <i>Mucilaginibacter</i><br>(100);   | 0.0 (0.0)        | 0.0 (0.0)        | 0.0 (0.0)        | <b>2.8 (2.4)</b> | 0.0 (0.0)        |
| 44 | <i>Bacteria</i> (100); <i>Proteobacteria</i> (100);<br><i>Alphaproteobacteria</i> (100); <i>Rhizobiales</i> (100);<br><i>Bradyrhizobiaceae</i> (100); <i>Bradyrhizobium</i> (89);              | 0.1 (0.0)        | 0.1 (0.0)        | <b>1.7 (0.5)</b> | 0.4 (0.2)        | 0.0 (0.0)        |
| 45 | <i>Bacteria</i> (100); <i>Proteobacteria</i> (100);<br><i>Alphaproteobacteria</i> (100); <i>Sphingomonadales</i><br>(100); <i>Sphingomonadaceae</i> (100); <i>Sphingosinicella</i><br>(100);   | 0.1 (0.0)        | 0.1 (0.0)        | 0.5 (0.1)        | <b>1.4 (0.5)</b> | 0.1 (0.0)        |
| 46 | <i>Bacteria</i> (100); unclassified (100); unclassified<br>(100); unclassified (100); unclassified (100);<br>unclassified (100);                                                               | <b>1.0 (0.1)</b> | 0.4 (0.1)        | 0.0 (0.0)        | 0.0 (0.0)        | 0.0 (0.0)        |
| 47 | <i>Bacteria</i> (100); unclassified (100); unclassified<br>(100); unclassified (100); unclassified (100);<br>unclassified (100);                                                               | <b>1.3 (0.2)</b> | 0.0 (0.0)        | 0.0 (0.0)        | 0.0 (0.0)        | 0.0 (0.0)        |
| 48 | <i>Bacteria</i> (100); <i>Verrucomicrobia</i> (100);<br><i>Spartobacteria</i> (99); unclassified (99); unclassified<br>(99); unclassified (99);                                                | 0.7 (0.1)        | 0.5 (0.1)        | 0.2 (0.1)        | 0.1 (0.0)        | 0.1 (0.1)        |
| 49 | <i>Bacteria</i> (100); <i>Proteobacteria</i> (100);<br><i>Betaproteobacteria</i> (100); unclassified (99);<br>unclassified (99); unclassified (99);                                            | 0.5 (0.0)        | <b>1.0 (0.1)</b> | 0.1 (0.0)        | 0.0 (0.1)        | 0.0 (0.0)        |
| 50 | <i>Bacteria</i> (100); unclassified (97); unclassified (97);<br>unclassified (97); unclassified (97); unclassified<br>(97);                                                                    | 0.5 (0.1)        | 0.6 (0.0)        | 0.3 (0.0)        | 0.1 (0.1)        | 0.0 (0.0)        |
| 51 | <i>Bacteria</i> (100); <i>Bacteroidetes</i> (100); <i>Cytophagia</i><br>(100); <i>Cytophagales</i> (100); <i>Cytophagaceae</i> (99);<br><i>Adhaeribacter</i> (99);                             | <b>1.1 (0.2)</b> | 0.2 (0.0)        | 0.0 (0.0)        | 0.0 (0.0)        | 0.0 (0.0)        |
| 52 | <i>Bacteria</i> (100); <i>Proteobacteria</i> (100);<br><i>Alphaproteobacteria</i> (100); <i>Rhizobiales</i> (100);<br>unclassified (100); unclassified (100);                                  | 0.5 (0.0)        | 0.5 (0.1)        | 0.2 (0.0)        | 0.1 (0.0)        | 0.2 (0.1)        |
| 53 | <i>Bacteria</i> (100); <i>Actinobacteria</i> (100);<br><i>Actinobacteria</i> (100); <i>Acidimicrobiales</i> (100);<br>unclassified (100); unclassified (100);                                  | 0.5 (0.2)        | 0.9 (0.2)        | 0.0 (0.0)        | 0.0 (0.0)        | 0.0 (0.0)        |
| 54 | <i>Bacteria</i> (100); <i>Proteobacteria</i> (100);<br><i>Gammaproteobacteria</i> (99); unclassified (99);<br>unclassified (99); unclassified (99);                                            | 0.7 (0.1)        | 0.5 (0.1)        | 0.0 (0.0)        | 0.0 (0.0)        | 0.1 (0.0)        |
| 55 | <i>Bacteria</i> (100); <i>Actinobacteria</i> (100);<br><i>Actinobacteria</i> (100); <i>Acidimicrobiales</i> (100);<br><i>Acidimicrobiaceae</i> (100); <i>Ilumatobacter</i> (100);              | 0.2 (0.0)        | 0.3 (0.1)        | 0.0 (0.0)        | 0.0 (0.0)        | <b>1.0 (0.4)</b> |
| 56 | <i>Bacteria</i> (100); <i>Verrucomicrobia</i> (100);<br><i>Verrucomicrobiae</i> (100); <i>Verrucomicrobiales</i><br>(100); <i>Verrucomicrobiaceae</i> (100);<br><i>Verrucomicrobium</i> (100); | 0.2 (0.0)        | 0.2 (0.0)        | 0.3 (0.0)        | 0.8 (1.2)        | 0.0 (0.0)        |

|    |                                                                                                                                                                                   |                  |           |           |           |           |
|----|-----------------------------------------------------------------------------------------------------------------------------------------------------------------------------------|------------------|-----------|-----------|-----------|-----------|
| 57 | <i>Bacteria</i> (100); <i>Gemmatimonadetes</i> (95);<br><i>Gemmatimonadetes</i> (95); <i>Gemmatimonadales</i> (95);<br><i>Gemmatimonadaceae</i> (95); <i>Gemmatimonas</i> (95);   | 0.4 (0.0)        | 0.7 (0.0) | 0.0 (0.0) | 0.0 (0.0) | 0.2 (0.0) |
| 58 | <i>Bacteria</i> (100); unclassified (100); unclassified<br>(100); unclassified (100); unclassified (100);<br>unclassified (100);                                                  | <b>1.0 (0.2)</b> | 0.1 (0.0) | 0.0 (0.0) | 0.0 (0.0) | 0.0 (0.0) |
| 59 | <i>Bacteria</i> (100); unclassified (100); unclassified<br>(100); unclassified (100); unclassified (100);<br>unclassified (100);                                                  | <b>1.0 (0.1)</b> | 0.0 (0.0) | 0.0 (0.0) | 0.1 (0.1) | 0.0 (0.0) |
| 60 | <i>Bacteria</i> (100); <i>Planctomycetes</i> (100);<br><i>Planctomycetia</i> (100); <i>Planctomycetales</i> (100);<br><i>Planctomycetaceae</i> (100); <i>Planctomyces</i> (95);   | 0.6 (0.1)        | 0.3 (0.1) | 0.2 (0.0) | 0.0 (0.0) | 0.1 (0.1) |
| 61 | <i>Bacteria</i> (100); unclassified (100); unclassified<br>(100); unclassified (100); unclassified (100);<br>unclassified (100);                                                  | 0.9 (0.0)        | 0.0 (0.0) | 0.0 (0.0) | 0.0 (0.0) | 0.0 (0.0) |
| 62 | <i>Bacteria</i> (100); <i>Proteobacteria</i> (100);<br><i>Gammaproteobacteria</i> (100); <i>Xanthomonadales</i><br>(100); <i>Xanthomonadaceae</i> (100); <i>Luteimonas</i> (99);  | 0.1 (0.0)        | 0.1 (0.0) | 0.1 (0.1) | 0.1 (0.0) | 0.9 (0.1) |
| 63 | <i>Bacteria</i> (100); <i>Proteobacteria</i> (100);<br><i>Alphaproteobacteria</i> (100); <i>Rhizobiales</i> (100);<br>unclassified (99); unclassified (99);                       | 0.3 (0.1)        | 0.4 (0.1) | 0.1 (0.0) | 0.1 (0.0) | 0.1 (0.0) |
| 64 | <i>Bacteria</i> (100); <i>Planctomycetes</i> (100);<br><i>Planctomycetia</i> (100); <i>Planctomycetales</i> (100);<br><i>Planctomycetaceae</i> (100); unclassified (100);         | 0.5 (0.1)        | 0.3 (0.0) | 0.0 (0.0) | 0.0 (0.0) | 0.1 (0.0) |
| 65 | <i>Bacteria</i> (100); <i>Acidobacteria</i> (100);<br><i>Acidobacteria_Gp3</i> (100); Gp3 (100); unclassified<br>(100); unclassified (100);                                       | 0.3 (0.0)        | 0.5 (0.1) | 0.1 (0.0) | 0.0 (0.0) | 0.1 (0.0) |
| 66 | <i>Bacteria</i> (100); <i>Proteobacteria</i> (100);<br><i>Alphaproteobacteria</i> (100); <i>Sphingomonadales</i><br>(100); <i>Erythrobacteraceae</i> (95); unclassified (94);     | 0.2 (0.0)        | 0.3 (0.1) | 0.0 (0.0) | 0.0 (0.0) | 0.4 (0.0) |
| 67 | <i>Bacteria</i> (100); <i>Planctomycetes</i> (100);<br><i>Planctomycetia</i> (100); <i>Planctomycetales</i> (100);<br><i>Planctomycetaceae</i> (100); <i>Pirellula</i> (99);      | 0.4 (0.0)        | 0.2 (0.1) | 0.2 (0.0) | 0.0 (0.0) | 0.0 (0.0) |
| 68 | <i>Bacteria</i> (100); <i>Actinobacteria</i> (100);<br><i>Actinobacteria</i> (100); <i>Acidimicrobiales</i> (100);<br><i>Acidimicrobiaceae</i> (100); <i>Ilumatobacter</i> (100); | 0.3 (0.0)        | 0.5 (0.2) | 0.0 (0.0) | 0.0 (0.0) | 0.1 (0.0) |
| 69 | <i>Bacteria</i> (100); <i>Bacteroidetes</i> (100);<br><i>Sphingobacteriia</i> (100); <i>Sphingobacteriales</i> (100);<br><i>Chitinophagaceae</i> (100); unclassified (100);       | 0.0 (0.0)        | 0.0 (0.0) | 0.1 (0.1) | 0.0 (0.0) | 0.8 (1.3) |
| 70 | <i>Bacteria</i> (100); <i>Planctomycetes</i> (100);<br><i>Planctomycetia</i> (100); <i>Planctomycetales</i> (100);<br><i>Planctomycetaceae</i> (100); unclassified (100);         | 0.3 (0.0)        | 0.1 (0.0) | 0.2 (0.0) | 0.1 (0.1) | 0.2 (0.0) |
| 71 | <i>Bacteria</i> (100); <i>Acidobacteria</i> (100);<br><i>Acidobacteria_Gp4</i> (100); Gp4 (100); unclassified<br>(100); unclassified (100);                                       | 0.1 (0.0)        | 0.2 (0.1) | 0.0 (0.0) | 0.0 (0.0) | 0.5 (0.1) |
| 72 | <i>Bacteria</i> (100); <i>Proteobacteria</i> (100);<br><i>Betaproteobacteria</i> (100); <i>Rhodocyclales</i> (81);<br><i>Rhodocyclaceae</i> (81); unclassified (81);              | 0.4 (0.1)        | 0.2 (0.0) | 0.0 (0.0) | 0.0 (0.0) | 0.0 (0.0) |
| 73 | <i>Bacteria</i> (100); <i>Proteobacteria</i> (100);<br><i>Alphaproteobacteria</i> (100); <i>Rhizobiales</i> (100);<br><i>Phyllobacteriaceae</i> (99); <i>Mesorhizobium</i> (97);  | 0.2 (0.0)        | 0.1 (0.1) | 0.1 (0.0) | 0.1 (0.0) | 0.2 (0.0) |
| 74 | <i>Bacteria</i> (100); <i>Nitrospirae</i> (100); <i>Nitrospira</i><br>(100); <i>Nitrospirales</i> (100); <i>Nitrospiraceae</i> (100);<br><i>Nitrospira</i> (100);                 | 0.5 (0.1)        | 0.1 (0.0) | 0.0 (0.0) | 0.0 (0.0) | 0.0 (0.0) |
| 75 | <i>Bacteria</i> (100); <i>Bacteroidetes</i> (100); unclassified<br>(100); unclassified (100); unclassified (100);<br>unclassified (100);                                          | 0.2 (0.0)        | 0.1 (0.0) | 0.2 (0.0) | 0.1 (0.2) | 0.1 (0.0) |
| 76 | <i>Bacteria</i> (100); <i>Proteobacteria</i> (100);<br><i>Alphaproteobacteria</i> (100); <i>Rhizobiales</i> (100);<br>unclassified (100); unclassified (100);                     | 0.2 (0.0)        | 0.2 (0.0) | 0.1 (0.0) | 0.1 (0.0) | 0.1 (0.0) |

|    |                                                                                                                                                                                           |           |           |           |           |           |
|----|-------------------------------------------------------------------------------------------------------------------------------------------------------------------------------------------|-----------|-----------|-----------|-----------|-----------|
| 77 | <i>Bacteria</i> (100); <i>Proteobacteria</i> (100);<br><i>Alphaproteobacteria</i> (100); <i>Caulobacterales</i> (100);<br><i>Caulobacteraceae</i> (100); <i>Phenylobacterium</i> (100);   | 0.3 (0.1) | 0.2 (0.0) | 0.1 (0.0) | 0.0 (0.0) | 0.0 (0.0) |
| 78 | <i>Bacteria</i> (100); <i>Acidobacteria</i> (100);<br><i>Acidobacteria_Gp3</i> (100); Gp3 (98); unclassified<br>(98); unclassified (98);                                                  | 0.4 (0.1) | 0.1 (0.0) | 0.0 (0.0) | 0.0 (0.0) | 0.0 (0.0) |
| 79 | <i>Bacteria</i> (100); <i>Proteobacteria</i> (100);<br><i>Gammaproteobacteria</i> (100); unclassified (100);<br>unclassified (100); unclassified (100);                                   | 0.4 (0.0) | 0.1 (0.0) | 0.0 (0.0) | 0.0 (0.0) | 0.0 (0.0) |
| 80 | <i>Bacteria</i> (100); <i>Proteobacteria</i> (100);<br><i>Alphaproteobacteria</i> (100); <i>Sphingomonadales</i><br>(100); <i>Sphingomonadaceae</i> (100); <i>Sphingomonas</i><br>(98);   | 0.2 (0.0) | 0.2 (0.1) | 0.0 (0.0) | 0.0 (0.0) | 0.1 (0.0) |
| 81 | <i>Bacteria</i> (100); <i>Proteobacteria</i> (100);<br><i>Gammaproteobacteria</i> (100); unclassified (100);<br>unclassified (100); unclassified (100);                                   | 0.2 (0.0) | 0.1 (0.0) | 0.1 (0.0) | 0.1 (0.1) | 0.1 (0.0) |
| 82 | <i>Bacteria</i> (100); <i>Planctomycetes</i> (100);<br><i>Planctomycetia</i> (100); <i>Planctomycetales</i> (100);<br><i>Planctomycetaceae</i> (100); unclassified (100);                 | 0.2 (0.1) | 0.2 (0.1) | 0.0 (0.0) | 0.0 (0.0) | 0.0 (0.0) |
| 83 | <i>Bacteria</i> (100); <i>Proteobacteria</i> (100);<br><i>Betaproteobacteria</i> (100); <i>Burkholderiales</i> (100);<br>unclassified (73); unclassified (73);                            | 0.0 (0.0) | 0.0 (0.0) | 0.1 (0.0) | 0.6 (0.8) | 0.0 (0.0) |
| 84 | <i>Bacteria</i> (100); <i>Proteobacteria</i> (100);<br><i>Betaproteobacteria</i> (100); unclassified (100);<br>unclassified (100); unclassified (100);                                    | 0.2 (0.0) | 0.3 (0.1) | 0.0 (0.0) | 0.0 (0.0) | 0.0 (0.0) |
| 85 | <i>Bacteria</i> (100); <i>Proteobacteria</i> (100);<br><i>Alphaproteobacteria</i> (100); <i>Sphingomonadales</i><br>(100); <i>Sphingomonadaceae</i> (100); <i>Sphingopyxis</i><br>(100);  | 0.0 (0.0) | 0.0 (0.0) | 0.0 (0.0) | 0.7 (0.8) | 0.0 (0.0) |
| 86 | <i>Bacteria</i> (100); <i>Proteobacteria</i> (100);<br><i>Alphaproteobacteria</i> (100); <i>Rhizobiales</i> (100);<br><i>Rhodobiaceae</i> (97); <i>Parvibaculum</i> (97);                 | 0.0 (0.0) | 0.0 (0.0) | 0.0 (0.0) | 0.6 (0.5) | 0.0 (0.0) |
| 87 | <i>Bacteria</i> (100); <i>Proteobacteria</i> (100);<br><i>Alphaproteobacteria</i> (100); <i>Rhodospirillales</i> (100);<br><i>Rhodospirillaceae</i> (100); <i>Magnetospirillum</i> (100); | 0.2 (0.0) | 0.1 (0.0) | 0.0 (0.0) | 0.0 (0.0) | 0.0 (0.0) |
| 88 | <i>Bacteria</i> (100); <i>Proteobacteria</i> (100);<br><i>Deltaproteobacteria</i> (100); <i>Myxococcales</i> (95);<br>unclassified (95); unclassified (95);                               | 0.3 (0.1) | 0.0 (0.0) | 0.0 (0.0) | 0.0 (0.0) | 0.0 (0.0) |
| 89 | <i>Bacteria</i> (100); <i>Proteobacteria</i> (100);<br><i>Gammaproteobacteria</i> (100); unclassified (100);<br>unclassified (100); unclassified (100);                                   | 0.2 (0.0) | 0.1 (0.0) | 0.0 (0.0) | 0.0 (0.0) | 0.0 (0.0) |
| 90 | <i>Bacteria</i> (100); <i>Proteobacteria</i> (100);<br><i>Alphaproteobacteria</i> (100); <i>Caulobacterales</i> (100);<br><i>Caulobacteraceae</i> (100); unclassified (91);               | 0.0 (0.0) | 0.0 (0.0) | 0.1 (0.1) | 0.4 (0.5) | 0.0 (0.0) |
| 91 | <i>Bacteria</i> (100); unclassified (100); unclassified<br>(100); unclassified (100); unclassified (100);<br>unclassified (100);                                                          | 0.1 (0.0) | 0.2 (0.0) | 0.0 (0.0) | 0.0 (0.0) | 0.0 (0.0) |
| 92 | <i>Bacteria</i> (100); <i>Proteobacteria</i> (100);<br><i>Alphaproteobacteria</i> (100); unclassified (100);<br>unclassified (100); unclassified (100);                                   | 0.2 (0.0) | 0.1 (0.0) | 0.0 (0.0) | 0.0 (0.0) | 0.0 (0.0) |
| 93 | <i>Bacteria</i> (100); <i>Verrucomicrobia</i> (100); <i>Opiritae</i><br>(100); <i>Opiritales</i> (100); <i>Opiritaceae</i> (100);<br><i>Opiritus</i> (100);                               | 0.3 (0.0) | 0.0 (0.0) | 0.0 (0.0) | 0.0 (0.0) | 0.0 (0.0) |
| 94 | <i>Bacteria</i> (100); <i>Proteobacteria</i> (100);<br><i>Alphaproteobacteria</i> (100); <i>Rhizobiales</i> (100);<br>unclassified (100); unclassified (100);                             | 0.1 (0.0) | 0.1 (0.1) | 0.0 (0.0) | 0.1 (0.0) | 0.0 (0.0) |
| 95 | <i>Bacteria</i> (100); <i>Proteobacteria</i> (100);<br><i>Alphaproteobacteria</i> (100); <i>Rhizobiales</i> (100);<br>unclassified (97); unclassified (97);                               | 0.2 (0.0) | 0.1 (0.0) | 0.0 (0.0) | 0.0 (0.0) | 0.0 (0.0) |
| 96 | <i>Bacteria</i> (100); <i>Proteobacteria</i> (100);<br><i>Gammaproteobacteria</i> (100); <i>Xanthomonadales</i><br>(96); <i>Sinobacteraceae</i> (94); <i>Steroidobacter</i> (94);         | 0.1 (0.0) | 0.1 (0.0) | 0.0 (0.0) | 0.0 (0.0) | 0.2 (0.0) |

|     |                                                                                                                                                                                             |           |           |           |           |           |
|-----|---------------------------------------------------------------------------------------------------------------------------------------------------------------------------------------------|-----------|-----------|-----------|-----------|-----------|
| 97  | <i>Bacteria</i> (100); <i>Proteobacteria</i> (100);<br><i>Alphaproteobacteria</i> (100); <i>Caulobacterales</i> (100);<br><i>Caulobacteraceae</i> (100); <i>Caulobacter</i> (94);           | 0.0 (0.0) | 0.0 (0.0) | 0.1 (0.0) | 0.4 (0.2) | 0.0 (0.0) |
| 98  | <i>Bacteria</i> (100); unclassified (100); unclassified<br>(100); unclassified (100); unclassified (100);<br>unclassified (100);                                                            | 0.3 (0.1) | 0.0 (0.0) | 0.0 (0.0) | 0.0 (0.0) | 0.0 (0.0) |
| 99  | <i>Bacteria</i> (100); <i>Proteobacteria</i> (100);<br><i>Alphaproteobacteria</i> (100); <i>Sphingomonadales</i><br>(100); <i>Sphingomonadaceae</i> (100); <i>Sphingopyxis</i><br>(100);    | 0.0 (0.0) | 0.0 (0.0) | 0.0 (0.0) | 0.4 (0.1) | 0.0 (0.0) |
| 100 | <i>Bacteria</i> (100); <i>Proteobacteria</i> (100);<br><i>Alphaproteobacteria</i> (100); unclassified (100);<br>unclassified (100); unclassified (100);                                     | 0.2 (0.0) | 0.1 (0.0) | 0.0 (0.0) | 0.0 (0.0) | 0.0 (0.0) |
| 101 | <i>Bacteria</i> (100); <i>Actinobacteria</i> (100);<br><i>Actinobacteria</i> (100); <i>Acidimicrobiales</i> (100);<br>unclassified (100); unclassified (100);                               | 0.1 (0.1) | 0.2 (0.0) | 0.0 (0.0) | 0.0 (0.0) | 0.0 (0.0) |
| 102 | <i>Bacteria</i> (100); <i>Proteobacteria</i> (100);<br><i>Gammaproteobacteria</i> (100); <i>Xanthomonadales</i><br>(100); <i>Xanthomonadaceae</i> (100);<br><i>Pseudoxanthomonas</i> (100); | 0.0 (0.0) | 0.0 (0.0) | 0.0 (0.0) | 0.4 (0.6) | 0.0 (0.0) |
| 103 | <i>Bacteria</i> (100); <i>Proteobacteria</i> (100);<br><i>Alphaproteobacteria</i> (100); unclassified (100);<br>unclassified (100); unclassified (100);                                     | 0.1 (0.0) | 0.1 (0.0) | 0.0 (0.0) | 0.0 (0.0) | 0.0 (0.0) |
| 105 | <i>Bacteria</i> (100); <i>Proteobacteria</i> (100);<br><i>Alphaproteobacteria</i> (100); <i>Sphingomonadales</i><br>(100); <i>Sphingomonadaceae</i> (100); unclassified<br>(100);           | 0.1 (0.0) | 0.1 (0.0) | 0.0 (0.0) | 0.0 (0.0) | 0.0 (0.0) |
| 106 | <i>Bacteria</i> (100); <i>Proteobacteria</i> (100);<br><i>Alphaproteobacteria</i> (100); <i>Rhodospirillales</i> (100);<br><i>Rhodospirillaceae</i> (100); unclassified (100);              | 0.1 (0.0) | 0.2 (0.0) | 0.0 (0.0) | 0.0 (0.0) | 0.0 (0.0) |
| 107 | <i>Bacteria</i> (100); <i>Proteobacteria</i> (100);<br><i>Gammaproteobacteria</i> (100); unclassified (100);<br>unclassified (100); unclassified (100);                                     | 0.2 (0.0) | 0.0 (0.0) | 0.0 (0.0) | 0.0 (0.0) | 0.0 (0.0) |
| 108 | <i>Bacteria</i> (100); unclassified (99); unclassified (99);<br>unclassified (99); unclassified (99); unclassified<br>(99);                                                                 | 0.1 (0.0) | 0.1 (0.1) | 0.0 (0.0) | 0.0 (0.0) | 0.0 (0.0) |
| 110 | <i>Bacteria</i> (100); <i>Planctomycetes</i> (100);<br><i>Planctomycetia</i> (100); <i>Planctomycetales</i> (100);<br><i>Planctomycetaceae</i> (100); unclassified (100);                   | 0.1 (0.0) | 0.0 (0.0) | 0.0 (0.0) | 0.0 (0.0) | 0.0 (0.0) |
| 113 | <i>Bacteria</i> (100); <i>Planctomycetes</i> (99);<br><i>Planctomycetia</i> (99); <i>Planctomycetales</i> (99);<br><i>Planctomycetaceae</i> (99); unclassified (99);                        | 0.1 (0.0) | 0.1 (0.0) | 0.0 (0.0) | 0.0 (0.0) | 0.0 (0.0) |
| 114 | <i>Bacteria</i> (100); unclassified (100); unclassified<br>(100); unclassified (100); unclassified (100);<br>unclassified (100);                                                            | 0.2 (0.0) | 0.0 (0.0) | 0.0 (0.0) | 0.0 (0.0) | 0.0 (0.0) |
| 115 | <i>Bacteria</i> (100); <i>Proteobacteria</i> (100);<br><i>Alphaproteobacteria</i> (100); <i>Rhizobiales</i> (100);<br>unclassified (84); unclassified (84);                                 | 0.0 (0.0) | 0.0 (0.0) | 0.0 (0.0) | 0.0 (0.0) | 0.1 (0.0) |
| 118 | <i>Bacteria</i> (100); <i>Acidobacteria</i> (100);<br><i>Acidobacteria_Gp1</i> (100); Gp1 (88); unclassified<br>(88); unclassified (88);                                                    | 0.1 (0.0) | 0.1 (0.0) | 0.0 (0.0) | 0.0 (0.0) | 0.0 (0.0) |
| 119 | <i>Bacteria</i> (100); <i>Bacteroidetes</i> (100); <i>Cytophagia</i><br>(100); <i>Cytophagales</i> (100); <i>Cytophagaceae</i> (100);<br><i>Dyadobacter</i> (100);                          | 0.0 (0.0) | 0.0 (0.0) | 0.0 (0.0) | 0.2 (0.4) | 0.0 (0.0) |
| 120 | <i>Bacteria</i> (100); unclassified (100); unclassified<br>(100); unclassified (100); unclassified (100);<br>unclassified (100);                                                            | 0.1 (0.0) | 0.0 (0.0) | 0.0 (0.0) | 0.0 (0.0) | 0.0 (0.0) |
| 125 | <i>Bacteria</i> (100); <i>Proteobacteria</i> (100);<br><i>Alphaproteobacteria</i> (100); <i>Rhizobiales</i> (100);<br><i>Xanthobacteraceae</i> (96); <i>Ancylobacter</i> (95);              | 0.0 (0.0) | 0.0 (0.0) | 0.0 (0.0) | 0.1 (0.1) | 0.0 (0.0) |



|            |                                                                                                                                                                                          |           |           |           |           |           |
|------------|------------------------------------------------------------------------------------------------------------------------------------------------------------------------------------------|-----------|-----------|-----------|-----------|-----------|
| <b>129</b> | <i>Bacteria</i> (100); <i>Proteobacteria</i> (100);<br><i>Gammaproteobacteria</i> (100); <i>Xanthomonadales</i><br>(100); <i>Xanthomonadaceae</i> (100); <i>Panacagrimonas</i><br>(100); | 0.0 (0.0) | 0.1 (0.0) | 0.0 (0.0) | 0.0 (0.0) | 0.0 (0.0) |
| <b>132</b> | <i>Bacteria</i> (100); <i>Proteobacteria</i> (100);<br><i>Gammaproteobacteria</i> (100); <i>Pseudomonadales</i><br>(100); <i>Pseudomonadaceae</i> (100); <i>Pseudomonas</i><br>(99);     | 0.0 (0.0) | 0.0 (0.0) | 0.0 (0.0) | 0.0 (0.0) | 0.1 (0.1) |
| <b>133</b> | <i>Bacteria</i> (100); <i>Proteobacteria</i> (100);<br><i>Betaproteobacteria</i> (100); unclassified (100);<br>unclassified (100); unclassified (100);                                   | 0.1 (0.0) | 0.0 (0.0) | 0.0 (0.0) | 0.0 (0.0) | 0.0 (0.0) |

<sup>a</sup> Average relative abundance with standard deviation shown in parentheses (n=3 libraries per condition). Values  $\geq 1.0\%$  are bolded. OTUs that did not comprise  $\geq 0.1\%$  of at least one treatment are not shown.

Table S3. Partial 16S rRNA gene representative sequences of all OTUs presented in Table 2.

| OTU | Representative sequence                                                                                                                                                                                                                                                     |
|-----|-----------------------------------------------------------------------------------------------------------------------------------------------------------------------------------------------------------------------------------------------------------------------------|
| 1   | ACGAAGGATGCAAGCGTTATCCGGATTCAATTGGGTTTTAAAGGGTGCCTAGGCGGACTGATAAGTCAGTGGT<br>GAAATCTCTCAGCTTAACTGAGAAACTGCCATTGATACTGTCTGGTCTAGAGTATAGATGACGTTGGCGGAA<br>TATGACATGTAGTGGTGAATACTTAGATATGTCATAGAACACCGATTGCGAAGGCAGCTAACGAAACTAT<br>AACTGACGCTGAGGCACGAAAGTGCAGGGGATCAAACAGG |
| 2   | ACGGAGGGTGAAGCGTTAATCGGAATTACTGGGCGTAAAGCGCGCTAGGCGGCTTGTAAAGTCGGATGT<br>GAAATCCCCGGGCTCAACCTGGGAAGTGCATTGATACTGGCTGGCTAGAGTGTGGTAGAGGGAAGTGGAA<br>TTCCAGGTGTAGCGGTGAAATGCGTAGATATCTGGGGGAACATCAGTGGCGAAGGCGGCTTCTTGGACCAA<br>CACTGACGCTGAGGCGCGAAAGCGTGGGGAGCAAACAGG       |
| 3   | ACGGAGGGTGAAGCGTTATCCGGATTCACTGGGTTTTAAAGGGTGCCTAGGCGGGCAGGTAAGTCAGTGGT<br>GAAATCCTAGAGCTTAACTCTAGAAGTGCCATTGATACTATCTGTCTTGAATATTGTGGAGGTAAGCGGAA<br>TATGTCATGTAGCGGTGAAATGCTTAGATATGACATAGAACACCTATTGCGAAGGCAGCTTACTACGCATA<br>TATTGACGCTGAGGCACGAAAGCGTGGGGATCAAACAGG    |
| 4   | ACAGAGGGTGAAGCGTTAATCGGAATTACTGGGCGTAAAGCGCGCTAGGTGGTTCGTTAAGTTGGATGT<br>GAAATCCCCGGGCTCAACCTGGGAAGTGCATCCAAAACCTGGCGAGCTAGAGTATGGTAGAGGGTGGTGGAA<br>TTTCTGTGTAGCGGTGAAATGCGTAGATATAGGAAGGAACACCAGTGGCGAAGGCGACCACCTGGACTGA<br>TACTGACACTGAGGTGCGAAAGCGTGGGGAGCAAACAGG      |
| 5   | ACGGAGGGGGCTAGCGTTGTTCGGAATTACTGGGCGTAAAGCGCACGTAGGCGGCTTTACAAGTCAGGGGT<br>GAAAGCCCGCGGCTCAACCGCGGAATTGCCCTTGAGACTGTATCGCTTGAACACGGGAGAGGTGAGTGGAA<br>TTCCGAGTGTAGAGGTGAAATTCGTAGATATTCGGAAGAACACCAGTGGCGAAGGCGGCTCACTGGACCGT<br>AGTTGACGCTGAGGTGCGAAAGCGTGGGGAGCAAACAGG    |
| 6   | ACGAAGGCCCAAGCGTTATCCGGATTCAATTGGGTTTTAAAGGGTGCCTAGGCGGGTGTATAAGTCAGTGGT<br>GAAAGCCCCAAGCTTAACTGGAAGTGCATTTGATACTGTCTGATCTTGAATGTGTTTGTAGTGGGCGGAA<br>TATGACATGTAGCGGTGAAATGCTTAGATATGTCATAGAACACCGATTGCGAAGGCAGCTCACAAAGCCAC<br>TATTGACGCTGAGGCACGAAAGCGTGGGGATCAAACAGG    |
| 7   | ACAGAGGGTGAAGCGTTAATCGGAATTACTGGGCGTAAAGCGCGCTAGGCGGTTGTGTAAGTTGGAGGT<br>GAAATCCCCGGGCTTAACTGGGCACCTGCCTTCAAACCTGCACGGCTAGAGTATGGGAGAGGAAGGTAGAA<br>TTCCAGGTGTAGCGGTGAAATGCGTAGAGATCTGGAGGAATACCGATGGCGAAGGCAGCCTTCTGGCCTAA<br>TACTGACGCTGAGGTGCGAAAGCATGGGGAGCAAACAGG      |
| 8   | ACGAGGGGTGAAGCGTTAATCGGAATTACTGGGCGTAAAGCGCGCTAGGCGGCTGAGTAAGTCGATTGT<br>GAAAGCCCCGGGCTCAACCTGGGAATTGCAGTCGAGACTGTTCCGGCTAGAGTGTGGGAGAGGGTGGTGGAA<br>TTCCCGGTGTAGCGGTGAAATGCGTAGATATCGGGAGGAACATCAGTGGCGAAGGCGACCACCTGGCCCAA<br>CACTGACGCTGAGGTGCGAAAGCGTGGGTAGCAAACAGG     |
| 9   | ACGAAGGGGGCTAGCGTTGCTCGGAATTACTGGGCGTAAAGGGAGCGTAGGCGGACTGTTTAGTCAGAGGT<br>GAAAGCCCAGGGCTCAACCTTGGAAATTGCCTTTGATACTGGCAGTCTTGAGTACGGAAGAGGTATGTGGAA<br>CTCCGAGTGTAGAGGTGAAATTCGTAGATATTCGGAAGAACACCAGTGGCGAAGGCGACATACTGGTCCGT<br>TACTGACGCTGAGGCTCGAAAGCGTGGGGAGCAAACAGG   |
| 10  | ACAGAGACTGCAAGCGTTAATCCGGATTCACTGGGCGTAAAGGGTGCAGGCGGCCGGGTGTGTCAGATGT<br>GAAATCCCCGAGGCTTAACTCGGAAGTGCCTTCAAACCTACTCGGCTAGAGTATGGAGAGGGTAACGGAA<br>TTCACGGTGTAGCAGTGAATGCGTAGATATCGTGAGGAACACCAGAGGCGAAGGCGGTTACCTGGACAAT<br>TACTGACGCTCAGGCACGAAAGCATGGGGAGCAAAAGG        |
| 11  | ACGAAGGGGGCTAGCGTTGCTCGGAATTACTGGGCGTAAAGGGCGCGTAGGCGGATGTTAAGTCGGGGGT<br>GAAAGCCCAGGGCTCAACCTTGGAAATTGCCTTCGATACTGGACATCTTGAGTACGGGAGAGGTGAGTGGAA<br>CTCCGAGTGTAGAGGTGAAATTCGTAGATATTCGGAAGAACACCAGTGGCGAAGGCGACTCACTGGCCCGT<br>TACTGACGCTGAGGCGCGAAAGCGTGGGGAGCAAACAGG    |
| 12  | ACAGAGGCCACAAGCATTAACTCGGAATCACTGGGCTTAAAGGGTGCAGGCGGCCCGTCAAGCGTTTTGT<br>GAAAGCCCTCGGCTCAACCGAGGAACAGCAGAGCGAACTGACGGGCTTGAAGGAGGTAGGGGCCGCGAGAA<br>CAGTAGGTGGAGCGGTGAAATGCGTAGATATCTACTGGAATGCCGATGGTGAAGACGCGCGGCTGGGCCCTT<br>TCTTGACGCTCATGCACGAAAGCGTGGGGATCAAACAGG    |
| 13  | ACGAAGGGTGAAGCGTTACTCGGAATTACTGGGCGTAAAGCGTGCCTAGGTGGTGGTTTTAAGTCTGCTGT<br>GAAAGCCCTGGGCTCAACCTGGGAATTGCAGTGGATACTGGATCACTAGAGTGTGGTAGAGGGATGCGGAA<br>TTTCTGGTGTAGCAGTGAATGCGTAGAGATCAGAAGGAACATCCGTGGCGAAGGCGGCATCTTGGGCCAA<br>CACTGACACTGAGGCACGAAAGCGTGGGGAGCAAACAGG     |

|           |                                                                                                                                                                                                                                                                             |
|-----------|-----------------------------------------------------------------------------------------------------------------------------------------------------------------------------------------------------------------------------------------------------------------------------|
| <b>14</b> | ACGGAGGGTGCAAGCGTTATCCGGATTTACTGGGTTTTAAAGGGTGCCTAGGTGGATTGGTAAGTCAGTGGT<br>GAAATCCCCGAGCTTAACTTGGGAAGTGCCTTTGATACTATCAGTCTTGAATACCGTGGAGGTGAGCGGAA<br>TATGTCATGTAGCGGTGAAATGCTTAGATATGACATAGAACACCAATTGCGAAGGCAGCTGGCTACACGAA<br>TATTGACACTGAGGCACGAAAGCGTGGGGATCAAACAGG   |
| <b>15</b> | ACGAAGGGTGCAAGCGTTACTCGGAATTACTGGGCGTAAAGCGTGCCTAGGTGGTTTCGTTAAGTCTGATGT<br>GAAAGCCCTGGGCTCAACCTGGGAATGGCATTGGATACTGGCGACCTAGAGTGCAGGTAGAGGGGTGTGGAA<br>TTCCCGGTGTAGCAGTAAAATGCGTAGATATCGGGAGGAACATCTGTGGCGAAGGCGACACCCCTGGACCAG<br>CACTGACACTGAGGCACGAAAGCGTGGGGAGCAAACAGG |
| <b>16</b> | ACGGAGGGTGCAAGCGTTATCCGGATTCACCTGGGTTTTAAAGGGTGCCTAGGTGGGCAGGTAAGTCAGTGGT<br>GAAATCTCCGGGCTTAACTCGGAAACTGCCATTGATACTATCTGTCTTGAATACCCCTGGAGGTGAGCGGAA<br>TATGTCATGTAGCGGTGAAATGCTTAGATATGACATAGAACACCCATTGCGAAGGCAGCTCACTACGGGAA<br>TATTGACACTGAGGCACGAAAGCGTGGGGATCAAACAGG |
| <b>17</b> | ACGGAGGGGAGCTAGCGTTGTTTCGGAATTACTGGGCGTAAAGCGCACGTAGGCGGTTATTCAAGTCAGAGGT<br>GAAAGCCCGGGCTCAACCCCGGAAGTGCCTTTGAAACTAGATAACTAGAATCTTGGAGAGGTGAGTGGAA<br>TTCCGAGTGTAGAGGTGAAATTCGTAGATATTCGGAAGAACACCAGTGGCGAAGGCGACTGACTGGACAAG<br>TATTGACGCTGAGGTGCGAAAGCGTGGGGAGCAAACAGG   |
| <b>19</b> | ACGAAGGGGGCTAGCGTTGTTTCGGAATTACTGGGCGTAAAGCGCACGTAGGCGGATATTTAAGTCAGGGGT<br>GAAATCCCAGAGCTCAACTCTGGAAGTGCCTTTGATACTGGGTATCTTGAGTATGGAAGAGGTAAGTGGAA<br>TTCCGAGTGTAGAGGTGAAATTCGTAGATATTCGGAGGAACACCAGTGGCGAAGGCGGCTTACTGGTCCAT<br>TACTGACGCTGAGGTGCGAAAGCGTGGGGAGCAAACAGG   |
| <b>20</b> | ACGAAGGGGGCTAGCGTTGCTTCGGAATCACTGGGCGTAAAGGGTGCCTAGGCGGGTTTTTAAGTCAGAGGT<br>GAAATCCTGGAGCTCAACTCCAGAAGTGCCTTTGATACTGAAAGTCTTGAGTATGGGAGAGGTGAGTGGAA<br>CTGCGAGTGTAGAGGTGAAATTCGTAGATATTCGCAAGAACACCAGTGGCGAAGGCGGCTCACTGGCCCAT<br>AACTGACGCTGAGGCACGAAAGCGTGGGGAGCAAACAGG   |
| <b>25</b> | ACGTAGGGTGCAAGCGTTAATTCGGAATTACTGGGCGTAAAGCGTGCAGGCGGTGATGTAAGACAGATGT<br>GAAATCCCCGGGCTCAACCTGGGAAGTGCATTTGTGACTGCATCGCTGGAGTGCAGGCGAGGGGGATGGAA<br>TTCCGCGTGTAGCAGTAAAATGCGTAGATATGCGGAGGAACACCGATGGCGAAGGCAATCCCCCTGGGCCCTG<br>CACTGACGCTCATGCACGAAAGCGTGGGGAGCAAACAGG   |
| <b>26</b> | ACGGAGGGTGCAAGCGTTATCCGGATTCACCTGGGTTTTAAAGGGTGCCTAGGCGGGTTGATAAGTCAGTGGT<br>GAAATCCTGGAGCTTAACTCCAGAAGTGCCTTTGATACTATCAGTCTTGAATATGGTGGAGGTAAGCGGAA<br>TATGTCATGTAGCGGTGAAATGCATAGATATGACATAGAACACCTATTGCGAAGGCAGCTTACTACGCCTA<br>TATTGACGCTGAGGCACGAAAGCGTGGGGATCAAACAGG  |
| <b>27</b> | ACGTAGGGTGCAAGCGTTAATTCGGAATTACTGGGCGTAAAGCGTGCAGGCGGTTATATAAGACAGATGT<br>GAAATCCCCGGGCTCAACCTGGGAAGTGCATTTGTGACTGTATAGCTAGAGTACGGCAGAGGGGGATGGAA<br>TTCCGCGTGTAGCAGTAAAATGCGTAGATATGCGGAGGAACACCAGTGGCGAAGGCAATCCCCCTGGGCCCTG<br>TACTGACGCTCATGCACGAAAGCGTGGGGAGCAAACAGG   |
| <b>28</b> | ACGGAGGGGAGCTAGCGTTGTTTCGGAATTACTGGGCGTAAAGCGCACGTAGGCGGCGATTTAAGTCAGAGGT<br>GAAAGCCCGGGGCTCAACCCCGGAAGTGCCTTTGAGACTGGATTGCTAGAATCTTGGAGAGGCGAGTGGAA<br>TTCCGAGTGTAGAGGTGAAATTCGTAGATATTCGGAAGAACACCAGTGGCGAAGGCGGCTCGCTGGACAAG<br>TATTGACGCTGAGGTGCGAAAGCGTGGGGAGCAAACAGG  |
| <b>35</b> | ACGAAGGGGGCTAGCGTTGCTTCGGAATTACTGGGCGTAAAGGGCGCTAGGCGGACAGTTTTAGTCAGAGGT<br>AAAAGCCCAGGGCTCAACCTTGGAACTGCCTTTGATACTGGCTGTCTTGAGTTCGGGAGAGGTGAGTGGAA<br>TGCCGAGTGTAGAGGTGAAATTCGTAGATATTCGGCGGAACACCAGTGGCGAAGGCGACTCACTGGCCCCG<br>TACTGACGCTGAGGCGCGAAAGCGTGGGGAGCAAACAGG   |
| <b>36</b> | ACGGAGGGTGCAAGCGTTATCCGGATTCACCTGGGTTTTAAAGGGTGCCTAGGCGGGTATGTAAGTCCGTGGT<br>GAAATCTCCGAGCTTAACTCGGAAACTGCCATTGGTACTGCGTATCTTGAATGTTGTGGAGGTGAGCGGAA<br>TATGTCATGTAGCGGTGAAATGCTTAGATATGACATAGAACACCAATTGCGAAGGCAGCTCACTACACAAA<br>TATTGACGCTGAGGCACGAAAGCGTGGGGATCAAACAGG  |
| <b>62</b> | ACGAAGGGTGCAAGCGTTACTCGGAATTACTGGGCGTAAAGCGTGCCTAGGTGGTTTCGTTAAGTCTGATGT<br>GAAAGCCCTGGGCTCAACCTGGGAATGGCATTGGATACTGGCGGGCTAGAGTGCAGGTAGAGGATGGCGGAA<br>TTCCCGGTGTAGCAGTAAAATGCGTAGAGATCGGGAGGAACATCTGTGGCGAAGGCGGCCATCTGGACCAG<br>CACTGACACTGAGGCACGAAAGCGTGGGGAGCAAACAGG  |
